# Supplementary material for: Staffs’ and managers’ perceptions of how and when discrete event simulation modelling can be used as a decision support in quality improvement: a focus group discussion study at two hospital settings in Sweden
Source: PubMed Central journal article supplement — BMJ Open. 2017 Jun 6;7(5):e013869. doi: 10.1136/bmjopen-2016-013869 (PMC5729970; doi:10.1136/bmjopen-2016-013869), 2017-06-06
Supplement: bmjopen-2016-013869.draft_revisions.pdf [file bmjopen-2016-013869.draft_revisions.pdf]

# BMJ Open

## From in-silico to in-reality: the value of simulation to healthcare improvement

|                                 |                                                                                                                                                                                                                                                                                                                                                                                                                                                                                                 |
|---------------------------------|-------------------------------------------------------------------------------------------------------------------------------------------------------------------------------------------------------------------------------------------------------------------------------------------------------------------------------------------------------------------------------------------------------------------------------------------------------------------------------------------------|
| Journal:                        | <i>BMJ Open</i>                                                                                                                                                                                                                                                                                                                                                                                                                                                                                 |
| Manuscript ID                   | bmjopen-2016-013869                                                                                                                                                                                                                                                                                                                                                                                                                                                                             |
| Article Type:                   | Research                                                                                                                                                                                                                                                                                                                                                                                                                                                                                        |
| Date Submitted by the Author:   | 20-Aug-2016                                                                                                                                                                                                                                                                                                                                                                                                                                                                                     |
| Complete List of Authors:       | Hvitfeldt Forsberg, Helena; Karolinska Institutet, Learning, Informatics, Management and Ethics<br>Mazzocato, Pamela; Karolinska Institutet, Learning, Informatics, Management, and Ethics<br>Glaser, Daniel; Karolinska Institutet, Learning, Informatics, Management and Ethics<br>Keller, Christina; Jönköping International Business School, Studies in Informatics<br>Unbeck, Maria; Karolinska Institutet, Department of Clinical Sciences at Danderyd Hospital, Division of Orthopaedics |
| <b>Primary Subject Heading</b>: | Health services research                                                                                                                                                                                                                                                                                                                                                                                                                                                                        |
| Secondary Subject Heading:      | Medical management, Qualitative research                                                                                                                                                                                                                                                                                                                                                                                                                                                        |
| Keywords:                       | Simulation modeling, Healthcare improvement, Focus group, RHEUMATOLOGY, Orthopedic care, emergency care                                                                                                                                                                                                                                                                                                                                                                                         |
|                                 |                                                                                                                                                                                                                                                                                                                                                                                                                                                                                                 |

SCHOLARONE™  
Manuscripts

only

1  
2  
3  
4  
5 TITLE PAGE  
6  
7  
8

9 **Title**

10  
11 **From in-silico to in-reality: the value of simulation to healthcare**  
12 **improvement**  
13

14  
15  
16 **Authors**

17 Helena Hvitfeldt-Forsberg\*, PhD. Department of Learning, Informatics, Management and  
18 Ethics, Medical Management Centre, Karolinska Institutet, Tomtebodavägen 18A, 17177,  
19 Stockholm, Sweden. E-mail: [helena.hvitfeldt.forsberg@ki.se](mailto:helena.hvitfeldt.forsberg@ki.se); Telephone number: 0046  
20 852483783  
21

22 Pamela Mazzocato PhD. Department of Learning Informatics Management and Ethics and  
23 Medical Management Center (MMC), Karolinska Institutet, Stockholm, Sweden.  
24

25 Daniel Glaser MSc, Department of Learning Informatics Management and Ethics and  
26 Medical Management Center (MMC), Karolinska Institutet, Stockholm, Sweden.  
27

28 Christina Keller PhD. Department of Informatics, Jönköping, International Business School,  
29 Jönköping, Sweden.  
30

31 Maria Unbeck RN, PhD. Department of Orthopedics, Danderyd Hospital, Stockholm,  
32 Department of Clinical Sciences, Danderyd Hospital, Karolinska Institutet, Stockholm,  
33 Sweden.  
34

35  
36 \*Corresponding author: Helena Hvitfeldt Forsberg.  
37

38 **Keywords**

39  
40 Simulation modeling, healthcare improvement, focus group, rheumatology, orthopedic care,  
41 emergency care.  
42

43  
44 **Word count**

45  
46 3153.  
47  
48  
49  
50  
51  
52  
53  
54  
55  
56  
57  
58  
59  
60

## Abstract

### *Objectives*

To explore healthcare staffs' and managers' perceptions of how and when simulation modeling can be used as a decision support in improvement efforts.

### *Design*

Two focus group discussions were performed.

### *Setting*

Two contexts were included; a rheumatology department and an orthopedic section both situated in Sweden.

### *Participants*

Healthcare staff and managers from the two contexts (n=14).

### *Interventions*

Two workshops were performed, one at each setting. Workshops were initiated by a short introduction to simulation modeling. Results from the respective simulation model were then presented and discussed in the following focus group discussion.

### *Main outcome measures*

The outcome measures were how and when simulation modeling could be used as a decision support in improvement efforts.

### *Results*

Categories from the content analysis are presented according to the research questions how and when simulation modeling can assist healthcare improvement. Regarding how, the participants mentioned that simulation modeling can act as a tool for support and a way to

1  
2  
3 visualize problems, potential solutions and their effects. Simulation modeling was considered  
4  
5 to possibly be used both locally and by management and as a pedagogical tool to develop and  
6  
7 test innovative ideas and to get everyone involved in the improvement work.  
8  
9

### 10 ***Conclusions***

11  
12 The potential as an information- and communication tool and as an instrument for pedagogic  
13  
14 work within healthcare improvement render a broader application and value of simulation  
15  
16 modeling than previously reported.  
17  
18  
19

### 20 **Strengths and limitations of this study**

- 21  
22
- 23 • The focus group discussions were conducted in close connection to real healthcare  
24 improvement efforts in two different settings.
  - 25 • This is one of the few studies studying the value of simulation modelling to healthcare  
26 improvement.
  - 27 • We draw conclusions from limited empirical data gathered from two FGDs only.  
28  
29 Nevertheless, an exploratory study like this could serve as a pilot for further similar  
30  
31  
32  
33  
34  
35  
36  
37  
38  
39  
40  
41  
42  
43  
44  
45  
46  
47  
48  
49  
50  
51  
52  
53  
54  
55  
56  
57  
58  
59  
60

## Introduction

Healthcare improvement can be defined as joint efforts to improve patients' health, healthcare operations and staff development [1]. The complexity of healthcare improvement includes for example the size and scope of the initiative and the numerous contextual factors which have made the outcomes of healthcare quality improvement to be questioned [2-4]. Improvement work often builds on testing changes, initially in small scale, to build knowledge on how changes are implemented and affecting practice [5-6]. This strategy may make it difficult to predict outcomes not in close connection in time or space [7].

Simulation modeling of healthcare systems and processes has been proved as a valid tool to attend to problems in healthcare such as resource allocation, patient flows, epidemiological concerns and utilization of resources [8-12].

All types of simulation aim to imitate reality to test, educate and learn. Regardless of the many models developed to elucidate important healthcare related issues, there is little research concerning the use, implementation and value of simulation in the everyday context of healthcare, in reality [13-15]. However, research has shown that simulation modeling can enable informed decisions, develop system knowledge, determine critical factors for the development of an organization, supply scenario analysis and options to choose from, help understand complex problems, facilitate communication and form plans and directions for future work [11]. More research is needed to fully understand the impact of simulation modeling in the improvement of healthcare [8, 12, 14, 15].

## Aim

The aim of this study was to explore healthcare staffs' and managers' perceptions of how and when simulation modeling can be used as a decision support in improvement efforts.

## Method

### Study design and setting

A qualitative study design was chosen to explore healthcare staffs' and managers' perceptions of simulation modeling in two healthcare organizations: a rheumatology department and an orthopedic section at a central surgical unit (including the Orthopedic department, the Anesthetic and Intensive care unit department, and the Surgical and Urological department) further referred to as orthopedic section. The two units were part of two hospitals located in two different county councils in Sweden. An overview of the two organizational settings is presented in Table 1.

[INSERT TABLE 1 HERE]

| Cases                   | Activity data                                                                                                                                                                                         | Hospital setting                                                                                                                    |
|-------------------------|-------------------------------------------------------------------------------------------------------------------------------------------------------------------------------------------------------|-------------------------------------------------------------------------------------------------------------------------------------|
| Rheumatology department | 1,400 new referrals and 6,000 outpatient visits per year.                                                                                                                                             | Publicly owned and financed county hospital with 2,300 employees. The hospital serves a population of 270,000 inhabitants.          |
| Orthopedic section      | In total 10,574 surgeries were performed at the central surgical unit in 2014 of which 4,512 were orthopedic surgeries (2,230 emergency and 2,282 elective surgeries) and 653 hip fracture surgeries. | Publicly owned and financed university hospital with 3,700 employees and has a catchment area of approximately 500,000 inhabitants. |

The Regional Ethics Committee in Stockholm has granted ethical approval for the study.

### Study participants

Purposeful sampling was used to select the study participants. Thus, healthcare staff and managers involved in the ongoing improvement efforts were deemed suitable to participate in this study because of their knowledge of the routines and needs of the organizations. Study participants were contacted via telephone and e-mail. Nine employees at the rheumatology

1  
2  
3 department were invited. Of those, seven agreed to participate in the study. Two declined the  
4  
5 invitation due to time constraints. At the orthopedic section, eight employees were invited. Of  
6  
7 those, seven accepted the invitation, and one of those had a late cancellation due to acute  
8  
9 illness and one declined due to a planned vacation. An overview of the study participants is  
10  
11 presented in table 2.  
12

13  
14  
15 [INSERT TABLE 2 HERE]  
16

17  
18

| Table 2. Study participants |                                                                                                                                                                            |
|-----------------------------|----------------------------------------------------------------------------------------------------------------------------------------------------------------------------|
| Case                        | Professional background and organizational role                                                                                                                            |
| Rheumatology department     | Four specialists in rheumatology and three registered nurses. Of those, one was a nurse manager and one the head of the department.                                        |
| Orthopedic section          | One orthopedic surgeon (also head of the trauma section at the Orthopedic department) and five registered nurses of whom two were nurse managers and one a section leader. |

19  
20  
21  
22  
23  
24  
25  
26  
27  
28

### 30 Data collection

31 Data was collected through two focus group discussions (FGDs) at the two units. Focus  
32  
33 groups can be defined as organized interactive group discussions that aim to explore a certain  
34  
35 topic [16]. The method was chosen since focus groups are very suitable when investigating  
36  
37 experiences, attitudes and emerging ideas from a group [17-18]. According to Morgan [19, p.  
38  
39 2], “the hallmark of focus groups is their explicit use of group interaction to produce data and  
40  
41 insights that would be less accessible without the interaction found in the group.”  
42  
43  
44

45 For both cases, customized simulation models were developed by the research team to address  
46  
47 the units’ specific needs. At the rheumatology department improvement efforts aimed to  
48  
49 improve the referral process for newly diagnosed patients. At the orthopedic section  
50  
51 improvement efforts aimed to improve access to care for patients with hip-fracture.  
52  
53  
54  
55  
56  
57  
58  
59  
60

1  
2  
3 The process of developing the two simulation models was somewhat different in the two  
4 cases. In the rheumatology case, the participants were introduced to the simulation model at a  
5 workshop where they had the opportunity to test the model and its included variables.  
6  
7

8  
9 Immediately after the workshop, the FGD was performed.  
10

11  
12 In the orthopedic case, the participants were included in the building and validation of the  
13 simulation model during several meetings. The workshop and FGD were held at the end of  
14 the project time.  
15  
16  
17

18  
19 In both cases, the workshops were initiated by a short introduction to simulation modeling.  
20 The researchers then presented the findings of the simulation model and led the FGDs  
21 discussion on how and when simulation modeling could be used as a decision support in  
22 improvement efforts.  
23  
24  
25  
26  
27

28  
29 The FGD was conducted at the respective unit during one hour and two researchers acted as  
30 moderators (CK and HHF in the rheumatology case and HHF and PM in the orthopedic case).  
31

32 One of the two researches moderating the FGDs led the discussion and the other took notes  
33 and asked follow-up questions. The interviews were also recorded.  
34  
35  
36  
37

38  
39 The FGDs were initiated by asking all participants to comment briefly on their experience of  
40 the simulation model and their work with their specific questions. This ensured that all  
41 participants got a chance to talk and for the recordings to represent each participant.  
42  
43

44 Following this start, the contents of the moderators' guide of questions guided the rest of the  
45 FGD. The following themes were included in the moderator's guide:  
46  
47  
48

- 49  
50  
51 ■ The experience of using the simulation model and the results.  
52
- 53  
54 ■ What problems/issues/questions are suitable to address with simulation modeling in  
55 healthcare?  
56  
57



- How can simulation modeling connect to improvement work?
- What are the value and trustworthiness of simulation modeling?

## Data analysis

The FGDs were transcribed verbatim by transcribers. The transcripts were analyzed using qualitative content analysis. Content analysis is commonly used in social sciences [20] and is a systematic analysis of text [21]. Two researchers (HHF and PM) conducted the coding and categorization together following the three general steps of performing content analysis outlined by Graneheim and Lundman [22]. The transcripts were first read through before meaning units were extracted and coded, and finally the codes were organized into categories. Each step was performed individually and were then reviewed and discussed, ending up in consensus.

## Findings

Results presented below are organized according to the different categories derived from the qualitative content analysis.

## When can simulation modeling be used

### Improvement support

Simulation was described by the FGD participants as a tool that could be used to motivate the need to implement certain changes both for staff and for management. This included also changes that are difficult to motivate either due to budget constraints, big investments or changes that have been tried before and that staff didn't believe in. Simulation modeling can support by visualizing both problems and potential solutions. Simulation completes the picture of only financial or process aspects by visualizing effects that are different dimensions of the same change.

**Test and evaluate ideas for improvement**

Participants expressed repeatedly in both FGDs that simulation modeling can be used to evaluate the effect of changes that have either been implemented or that are under development or at an idea stage. Simulation modeling was considered a quicker and more efficient ways to test ideas of changes not yet implemented compared to testing in reality. Furthermore, changes can be tested without influencing patient care.

*“It is exciting to be able to test a hypothesis in a computer environment to see what results you can anticipate. It is often difficult to test changes in real life, it takes time, costs money and results are sometimes uncertain”.*

Participants emphasized that simulation modeling can be a way to more systematically test change ideas and evaluating them, rather than just implementing changes without follow up. Furthermore, they expressed that the model can be a pedagogical tool to develop and test ideas that can help staff getting engaged and involved in the improvement work.

*“A pedagogical tool to use in our work team in improvement work. By thinking that nothing is forbidden to suggest, we can test many different things and start thinking outside the box. It is so easy to get stuck in patterns”.*

Testing of ideas got some of the participants to think about existing work routines and new improvement ideas were created and previous ideas were rejected.

*“We thought that if we just had more rooms, all our problems would go away. But we saw no substantial change when we tested it in the model. It all depends on the number of doctors that are available after all, that is the answer we got. We even saw that, right now, we are not using all the rooms efficiently”.*

## How can simulation modeling be used

### Questions suitable for simulation modeling

Simulation modeling can be used to address concrete and measurable questions such as for planning, resource allocation and staff scheduling. One area of application that was raised several times during the FGDs was related to cost efficiency.

*“The future will be more about budgets and finances due to our expensive treatments. This [simulation model] can be a way to present financial figures to the management”.*

*“It is easier to connect numbers with a cause rather than to just talk about the cause itself”.*

This includes showing the cost efficiency of changes implemented and to make staff more aware of costs related to certain operations. Further on, it can be used to find ways to use resources in a more efficient way.

### Validity

Participants expressed the importance of building the model on valid and reliable data. Using incorrect data or data in an incorrect way will undermine the simulation model and the staff's trust in the model. The simulation model must reflect the organization and real processes and data. Input from staff is important to ensure the validity of the model as they are the ones with knowledge of processes and operations.

*“The method is fine, the difficult part is what you put into the model”*

Participants stressed that in order to use any simulation model, it is important that all processes and logics incorporated in the model are well known to the user. This is to prevent from misinterpreting model output and results. Relying on and trusting the model requires a deep and profound understanding of the model and participation during the process of building the model.

1  
2  
3 *"Users must be familiar with the model in order to critically evaluate results. [It's]*  
4  
5 *dangerous if results are interpreted in the wrong way".*  
6  
7

### 8 **Conducting simulation modeling projects**

9 Results from the FGDs revealed two aspects of use of simulation modeling; local use at the  
10 clinic in their improvement work and to guide management on planned changes or responses  
11 to changes suggested by management. Staff must be involved from the beginning to inform  
12 the building of the model with data and questions to test in the model. Involving staff from the  
13 beginning is important to develop trust for the simulation model.  
14  
15  
16  
17  
18  
19

20  
21 *"A simulation project must be approved by management and well supported by the staff".*  
22

23  
24 *"In improvement work, involvement from everyone is essential, perhaps simulation modeling*  
25 *can act as a tool to inform and inspire colleagues".*  
26  
27

28  
29 Simulation modeling projects must be approved by management and staff and be well  
30 communicated within the organization. The group working with the simulation model cannot  
31 be too big and there must be a person in charge of the work. The importance of using the  
32 simulation model together, in multi-disciplinary teams, was emphasized. Specific persons  
33 holding positions, such as schedulers, nurse managers and heads of departments, were  
34 mentioned as potential users.  
35  
36  
37  
38  
39  
40  
41  
42

43  
44 *"Simulation modeling should be used locally, at our clinic and by us. It should be used to*  
45 *show how we work and our results, at meetings and externally as marketing".*  
46  
47

48  
49 *"A good tool to show management what we do and our plans".*  
50  
51

### 52 **Value and opportunities**

53 Participants expressed an overall positive attitude towards simulation modeling. They  
54 identified different opportunities where simulation modeling can add value to the  
55  
56  
57

1  
2  
3 development of their organization. These include identifying trends and understanding  
4  
5 complex relationships between processes and systems. Moreover, simulation can help to face  
6  
7 future challenges.  
8

9  
10 *“Simulation modeling at the right time can be very valuable, when initiating improvement it*  
11  
12 *is beneficial to see how small changes can have great effects”.*  
13

14  
15 *“You get an overview, you see the overall picture that can be used to stimulate improvement*  
16  
17 *work”.*  
18

19  
20 *“Simulation modeling can help you find new models and aid the individual learning when*  
21  
22 *seeing the relation to their respective work. To the organization it might be more on how to*  
23  
24 *accomplish goals and see how the overall picture is affected?”*  
25  
26  
27

## 28 29 **Discussion**

30  
31 This study set out to explore healthcare staffs’ and managers’ perceptions of how and when  
32  
33 simulation modeling can be used as a decision support in improvement efforts. Simulation  
34  
35 was described as a tool that could be used to evaluate and develop improvement ideas and  
36  
37 help motivate the need to implement certain changes both for staff and for management. Also,  
38  
39 simulation modeling can motivate difficult change, visualizing effects and also financial  
40  
41 aspects. Simulation modeling was best valued to address concrete and measureable questions  
42  
43 such as for planning, resource allocation, staff scheduling and cost efficiency. Two areas of  
44  
45 use of simulation modeling in healthcare improvement were stressed in the two focus groups:  
46  
47 locally in the clinical improvement work and to guide management on planned changes or  
48  
49 responses and effects to changes suggested by management. The early involvement of staff in  
50  
51 the simulation project and use of correct data to validate the model is crucial to staff to trust  
52  
53 and use the model.  
54  
55  
56  
57

1  
2  
3 When comparing the results to previous literature, there are several evident similarities.  
4  
5 Concerning the potential users of the simulation model, at the clinical level or in management,  
6  
7 it is important to consider model knowledge and the ability to present it to others, data  
8  
9 availability and support from leadership [14]. Regarding the testing part and exploring what is  
10  
11 outside of the box, Pidd describes simulation as a vehicle for experimentation where trial and  
12  
13 error can be performed without concerns for reality but with a great opportunity to learn [23].  
14  
15 Simulation modeling offers a holistic view on addressing change and improvement in  
16  
17 complex systems and its inherent components by displaying the effects of change  
18  
19 immediately [7]. Visualizing the problem and a potential solution was, in the FGDs,  
20  
21 considered powerful in engaging healthcare staff in improvement work. This interactive  
22  
23 opportunity has been proposed to make staff more willing to embrace change [7]. However,  
24  
25 the formation of a representable clinical team to involve in the simulation modeling work is  
26  
27 not always easy [15]. Our first simulation focus group revealed the responders wish to include  
28  
29 management and the second focus group wanted to include the staff further. Co-producing the  
30  
31 model with staff, managers and modelers are important to build a step by step understanding  
32  
33 of the model logic and its validity [23-27]. Depending on the identified users, simulation  
34  
35 models can be used to aid communication in creating a shared mental model [25, 28-30].  
36  
37  
38  
39  
40  
41 Drawing from our results we can see values emerging from simulation modeling as a way to  
42  
43 work with change and improvement, especially when initiating improvement work, a way to  
44  
45 visually communicate planned changes and operations and subsequent consequences.  
46  
47  
48 Simulation modeling can be a tool to be used at different levels of healthcare but according to  
49  
50 our findings it might suit best at the local clinical improvement and for management planning  
51  
52 and allocating resources. Before initiating a simulation modeling project, the formation of the  
53  
54 project team is essential to ensure model validity and reliability. Bringing in the aspects of  
55  
56  
57  
58  
59  
60

1  
2  
3 implementation, evaluation and research requires even greater consideration of the project  
4  
5 team but might enable the transition from in-silico to in-reality and create value for the health  
6  
7 care organization.  
8  
9

10 Limitations in our design regard the fact that we draw conclusions from limited empirical data  
11  
12 gathered from two FGDs only. Nevertheless, an exploratory study like this could serve as a  
13  
14 pilot for further similar research. FGDs themselves can be subject to different impediments if  
15  
16 not moderated well. The group dynamics are essential and allowing everyone to talk and  
17  
18 present their opinion [17, 31, 32]. Using a moderator's guide and introductory questions for  
19  
20 everyone to answer may have facilitated the FGDs.  
21  
22  
23  
24

## 25 **Conclusions**

26 The emerging categories from the content analysis are presented according to the research  
27  
28 questions how and when simulation modeling can assist healthcare improvement. Regarding  
29  
30 how, the participants mentioned that simulation modeling can act as a tool for support and a  
31  
32 way to visualize problems and potential solutions, as an information- and communication tool  
33  
34 to show management planned improvements and their effect. Simulation modeling was  
35  
36 considered to possibly be used both locally and by management, but the user should be  
37  
38 familiar with model logic and data to interpret results correctly. Relating to when, participants  
39  
40 thought simulation modeling could be used as a pedagogical tool to develop and test ideas, to  
41  
42 think outside the box and to get everyone involved in the improvement work.  
43  
44  
45  
46  
47

48 This study showed that simulation modeling has more to offer than has previously been  
49  
50 described in the literature. The potential as an information- and communication tool, as an  
51  
52 instrument for pedagogic work within healthcare improvement and allowing thinking outside  
53  
54 the box render a broader application and value of simulation modeling.  
55  
56  
57

## Contributorship statement

HHF, PM, MU, DG and CK designed the study. HHF, PM, MU and CK collected the data. HHF, MU, PM and CK drafted the manuscript. Everyone have been involved in reading and critically revising the manuscript. All authors approved the final manuscript and are accountable for all parts of the work.

## Competing Interests

The authors declare that they have no competing interests.

## Funding

We wish to thank the involved units for their participation in this study and the Regional Agreement on Medical Training and Clinical Research (ALF) for financial support.

## Data sharing statement

FGD moderators guide are available upon request to the authors.

## Acknowledgements

The authors wish to thank the involved units for their participation in this study.



## References

1. BATALDEN, P. B. & DAVIDOFF, F. 2007. What is "quality improvement" and how can it transform healthcare? *Qual Saf Health Care*, 16, 2-3.
2. BLUMENTHAL, D. & KILO, C. M. 1998. A report card on continuous quality improvement. *Milbank Q*, 76, 625-48, 511.
3. KAPLAN, H. C., BRADY, P. W., DRITZ, M. C., HOOPER, D. K., LINAM, W. M., FROEHLE, C. M. & MARGOLIS, P. 2010. The influence of context on quality improvement success in health care: a systematic review of the literature. *Milbank Q*, 88, 500-59.
4. THOR, J., HERRLIN, B., WITTLOV, K., OVRETVEIT, J. & BROMMELS, M. 2010. Evolution and outcomes of a quality improvement program. *Int J Health Care Qual Assur*, 23, 312-27.
5. LANGLEY, G. J. 2009. *The improvement guide : a practical approach to enhancing organizational performance*, San Francisco, Jossey-Bass.
6. SHEWHART, W. A. & DEMING, W. E. 1986. *Statistical method from the viewpoint of quality control*, New York, Dover.
7. SLOVENSKY, D. J. & MORIN, B. 1997. Learning through simulation: the next dimension in quality improvement. *Qual Manag Health Care*, 5, 72-9.
8. FONE, D., HOLLINGHURST, S., TEMPLE, M., ROUND, A., LESTER, N., WEIGHTMAN, A., ROBERTS, K., COYLE, E., BEVAN, G. & PALMER, S. 2003. Systematic review of the use and value of computer simulation modelling in population health and health care delivery. *Journal of Public Health Medicine*, 25, 325-35.
9. BRAILSFORD, S., HARPER, P., PATEL, B. & PITT, M. 2009. An analysis of the academic literature on simulation and modeling in health care. *Journal of Simulation*, 3, 130-140.
10. GÜNAL, M. & PIDD, M. 2010. Discrete event simulation for performance modelling in health care: a review of the literature. *Journal of Simulation*, 4, 42-51.
11. FORSBERG, H. H., ARONSSON, H., KELLER, C. & LINDBLAD, S. 2011. Managing health care decisions and improvement through simulation modeling. *Quality management in health care*, 20, 15-29.
12. JUN, J. B., JACOBSON, S. H. & SWISHER, J. R. 1999. Application of discrete-event simulation in health care clinics: A survey. *Journal of the Operational Research Society*, 50, 109-123.
13. BRAILSFORD, S. 2005. Overcoming the barriers to implementation of operations research simulation models in healthcare. *Clinical and investigative medicine. Medecine clinique et experimentale*, 28, 312-5.
14. BRAILSFORD, S., BOLT, T. B., BUCCI, G., CHAUSSALET, T. M., CONNELL, N. A., HARPER, P. R., KLEIN, J. H., PITT, M. & TAYLOR, M. 2011. Overcoming the barriers: a qualitative study of simulation adoption in the NHS. *Journal of the Operational Research Society*.
15. MONKS, T., PEARSON, M., PITT, M., STEIN, K., & JAMES, M. A. (2015). Evaluating the impact of a simulation study in emergency stroke care. *Operations Research for Health Care*, 6, 40–49. <http://doi.org/10.1016/j.orhc.2015.09.002>

16. BECKER, S. & BRYMAN, A. 2004. *Understanding research for Social Policy and Practice - themes, methods and approaches*, Great Britain, The Policy Press.
17. KRUEGER, R. A. & CASEY, M. A. 2000. *Focus groups : a practical guide for applied research*, Thousand Oaks, Calif., Sage Publications.
18. POPE, C., VAN ROYEN, P. & BAKER, R. 2002. Qualitative methods in research on healthcare quality. *Qual Saf Health Care*, 11, 148-52.
19. MORGAN, D. L. (1997). Focus Groups as Qualitative Research. Sage Publications, 32-46. <http://doi.org/10.4135/9781412984287>
20. DIXON-WOODS, M., AGARWAL, S., JONES, D., YOUNG, B. & SUTTON, A. 2005. Synthesising qualitative and quantitative evidence: a review of possible methods. *J Health Serv Res Policy*, 10, 45-53.
21. KRIPPENDORFF, K. 2004. *Content analysis : an introduction to its methodology*, Thousand Oaks, Calif., Sage.
22. GRANEHEIM, U. H. & LUNDMAN, B. 2004. Qualitative content analysis in nursing research: concepts, procedures and measures to achieve trustworthiness. *Nurse education today*, 24, 105-12.
23. PIDD, M. 2004. *Computer simulation in management science*, Chichester, England ; Hoboken, NJ, Wiley.
24. AHARONSON-DANIEL, L., PAUL, R. J. & HEDLEY, A. J. 1996. Management of queues in out-patient departments: the use of computer simulation. *J Manag Med*, 10, 50-8, 3.
25. ALKAABI, R., EL HALIM, A. O. A., MAHMOUD, S. & IEEE. Improving resource allocation efficiency in health care delivery systems. 19th Annual Canadian Conference on Electrical and Computer Engineering, May 07-10 2006 Ottawa, Canada. 2360-2365.
26. COCHRAN, J. K. & BHARTI, A. 2006. Stochastic bed balancing of an obstetrics hospital. *Health Care Manag Sci*, 9, 31-45.
27. BANKS, J. 1998. *Handbook of simulation : principles, methodology, advances, applications, and practice*, New YorkNorcross, Ga., Wiley
28. ELKHUIZEN, S. G., DAS, S. F., BAKKER, P. J. & HONTELEZ, J. A. 2007. Using computer simulation to reduce access time for outpatient departments. *Qual Saf Health Care*, 16, 382-6.
29. HEINRICH, M., BEEKMAN, R. & LIMBURG, M. 2000. Simulation to estimate the capacity of a stroke unit. *Stud Health Technol Inform*, 77, 47-50.
30. RYTILÄ, J. & SPENS, K. 2006. Using simulation to increase efficiency in blood supply chains. *Management Research News*, 29, 801-819.
31. ROBSON, C. 2002. *Real world research : a resource for social scientists and practitioner-researchers*, Oxford, UK ; Madden, Mass., Blackwell Publishers.
32. MARSHALL, C. & ROSSMAN, G. B. 2006. *Designing qualitative research*, Thousands Oaks, Calif., Sage Publications.

## Standards for Reporting Qualitative Research (SRQR)

| Section               | Topic                                       | Item                                                                                                                                                                                                                                                                                                                                             | Where in the article the item is addressed                                   |
|-----------------------|---------------------------------------------|--------------------------------------------------------------------------------------------------------------------------------------------------------------------------------------------------------------------------------------------------------------------------------------------------------------------------------------------------|------------------------------------------------------------------------------|
| <b>Title abstract</b> |                                             |                                                                                                                                                                                                                                                                                                                                                  |                                                                              |
|                       | Title                                       | Concise description of the nature and topic of the study Identifying the study as qualitative or indicating the approach (e.g., ethnography, grounded theory) or data collection methods (e.g., interview, focus group) is recommended                                                                                                           | The title meets these criteria, see page 1.                                  |
|                       | Abstract                                    | Summary of key elements of the study using the abstract format of the intended publication; typically includes background, purpose, methods, results, and conclusions                                                                                                                                                                            | Done, see pages 2-3.                                                         |
| <b>Introduction</b>   |                                             |                                                                                                                                                                                                                                                                                                                                                  |                                                                              |
|                       | Problem formulation                         | Description and significance of the problem/phenomenon studied; review of relevant theory and empirical work; problem statement                                                                                                                                                                                                                  | Addressed in the last section in the introduction, see page 4.               |
|                       | Purpose or research question                | Purpose of the study and specific objectives or questions                                                                                                                                                                                                                                                                                        | See Aim in the paragraph in the intro page 4.                                |
| <b>Methods</b>        |                                             |                                                                                                                                                                                                                                                                                                                                                  |                                                                              |
|                       | Qualitative approach and research paradigm  | Qualitative approach (e.g., ethnography, grounded theory, case study, phenomenology, narrative research) and guiding theory if appropriate; identifying the research paradigm (e.g., postpositivist, constructivist/interpretivist) is also recommended;                                                                                         | Qualitative content analysis was explained and motivated, see pages 5 and 8. |
|                       | Researcher characteristics and reflexivity  | Researchers' characteristics that may influence the research, including personal attributes, qualifications/experience, relationship with participants, assumptions, and/or presuppositions; potential or actual interaction between researchers' characteristics and the research questions, approach, methods, results, and/or transferability | No specifically characteristics addressed.                                   |
|                       | Context                                     | Setting/site and salient contextual factors;                                                                                                                                                                                                                                                                                                     | See "Study design and setting" section in the methods, pages 5-6.            |
|                       | Sampling strategy                           | How and why research participants, documents, or events were selected; criteria for deciding when no further sampling was necessary (e.g., sampling saturation);                                                                                                                                                                                 | Second paragraph in the methods section, pages 5-6                           |
|                       | Ethical issues pertaining to human subjects | Documentation of approval by an appropriate ethics review board and participant consent, or explanation for lack thereof; other confidentiality and data security issues                                                                                                                                                                         | Last sentence in the first paragraph of the methods section, page 5.         |
|                       | Data collection methods                     | Types of data collected; details of data collection procedures including (as appropriate) start and stop dates of data collection and analysis, iterative process, triangulation of sources/methods,                                                                                                                                             | See "Data collection section in methods, page 6.                             |

|                         |                                                                                              |                                                                                                                                                                                                                                                                                                       |                                                                                              |
|-------------------------|----------------------------------------------------------------------------------------------|-------------------------------------------------------------------------------------------------------------------------------------------------------------------------------------------------------------------------------------------------------------------------------------------------------|----------------------------------------------------------------------------------------------|
|                         |                                                                                              | and modification of procedures in response to evolving study findings; rationale b                                                                                                                                                                                                                    |                                                                                              |
|                         | Data collection instruments and technologies                                                 | Description of instruments (e.g., interview guides, questionnaires) and devices (e.g., audio recorders) used for data collection; if/how the instrument(s) changed over the course of the study                                                                                                       | Last paragraph in “Data collection” section, page 7.                                         |
|                         | Units of study                                                                               | Number and relevant characteristics of participants, documents, or events included in the study; level of participation (could be reported in results)                                                                                                                                                | See “Study participants” in the methods section, page 5-6.                                   |
|                         | Data processing                                                                              | Methods for processing data prior to and during analysis, including transcription, data entry, data management and security, verification of data integrity, data coding, and anonymization/deidentification of excerpts                                                                              | See “Data Analysis” in the methods section, page 8.                                          |
|                         | Data analysis                                                                                | Process by which inferences, themes, etc., were identified and developed, including the researchers involved in data analysis; usually references a specific paradigm or approach; rationale b                                                                                                        | Last three sentences in “Data Analysis” in the methods section, page 8.                      |
|                         | Techniques to enhance trustworthiness                                                        | Techniques to enhance trustworthiness and credibility of data analysis (e.g., member checking, audit trail, triangulation); rationale b                                                                                                                                                               | See “Data Analysis” in the methods section, page 8.                                          |
| <b>Results/findings</b> |                                                                                              |                                                                                                                                                                                                                                                                                                       |                                                                                              |
|                         | Synthesis and interpretation                                                                 | Main findings (e.g., interpretations, inferences, and themes); might include development of a theory or model, or integration with prior research or theory                                                                                                                                           | Yes.                                                                                         |
|                         | Links to empirical data                                                                      | Evidence (e.g., quotes, field notes, text excerpts, photographs) to substantiate analytic findings                                                                                                                                                                                                    | Examples of from the data analyzed are reported throughout the findings section, pages 8-12. |
| <b>Discussion</b>       |                                                                                              |                                                                                                                                                                                                                                                                                                       |                                                                                              |
|                         | Integration with prior work, implications, transferability, and contribution(s) to the field | Short summary of main findings; explanation of how findings and conclusions connect to, support, elaborate on, or challenge conclusions of earlier scholarship; discussion of scope of application/generalizability; identification of unique contribution(s) to scholarship in a discipline or field | Yes, throughout the discussion, pages 12-14.                                                 |
|                         | Limitations                                                                                  | Trustworthiness and limitations of findings                                                                                                                                                                                                                                                           | Yes, see last paragraph in the discussion, page 14.                                          |
| <b>Other</b>            |                                                                                              |                                                                                                                                                                                                                                                                                                       |                                                                                              |

|  |                       |                                                                                                                |                                                                   |
|--|-----------------------|----------------------------------------------------------------------------------------------------------------|-------------------------------------------------------------------|
|  | Conflicts of interest | Potential sources of influence or perceived influence on study conduct and conclusions; how these were managed | Conflicts of interest statement included in the article, page 15. |
|  | Funding               | Sources of funding and other support; role of funders in data collection, interpretation, and reporting        | Funding sources have been mentioned, page 15.                     |

For peer review only

# BMJ Open

**Staffs' and managers' perceptions of how and when discrete event simulation modeling can be used as a decision support in quality improvement: a focus group discussion study at two hospital settings in Sweden**

|                                 |                                                                                                                                                                                                                                                                                                                                                                                                                                                                                                 |
|---------------------------------|-------------------------------------------------------------------------------------------------------------------------------------------------------------------------------------------------------------------------------------------------------------------------------------------------------------------------------------------------------------------------------------------------------------------------------------------------------------------------------------------------|
| Journal:                        | <i>BMJ Open</i>                                                                                                                                                                                                                                                                                                                                                                                                                                                                                 |
| Manuscript ID                   | bmjopen-2016-013869.R1                                                                                                                                                                                                                                                                                                                                                                                                                                                                          |
| Article Type:                   | Research                                                                                                                                                                                                                                                                                                                                                                                                                                                                                        |
| Date Submitted by the Author:   | 30-Oct-2016                                                                                                                                                                                                                                                                                                                                                                                                                                                                                     |
| Complete List of Authors:       | Hvitfeldt Forsberg, Helena; Karolinska Institutet, Learning, Informatics, Management and Ethics<br>Mazzocato, Pamela; Karolinska Institutet, Learning, Informatics, Management, and Ethics<br>Glaser, Daniel; Karolinska Institutet, Learning, Informatics, Management and Ethics<br>Keller, Christina; Jönköping International Business School, Studies in Informatics<br>Unbeck, Maria; Karolinska Institutet, Department of Clinical Sciences at Danderyd Hospital, Division of Orthopaedics |
| <b>Primary Subject Heading</b>: | Health services research                                                                                                                                                                                                                                                                                                                                                                                                                                                                        |
| Secondary Subject Heading:      | Medical management, Qualitative research                                                                                                                                                                                                                                                                                                                                                                                                                                                        |
| Keywords:                       | Simulation modeling, Healthcare improvement, Focus group, RHEUMATOLOGY, Orthopedic care, emergency care                                                                                                                                                                                                                                                                                                                                                                                         |
|                                 |                                                                                                                                                                                                                                                                                                                                                                                                                                                                                                 |

SCHOLARONE™  
Manuscripts

TITLE PAGE

## Title

**Staffs' and managers' perceptions of how and when discrete event simulation modeling can be used as a decision support in quality improvement: a focus group discussion study at two hospital settings in Sweden**

## Authors

Helena Hvitfeldt-Forsberg\*, PhD. Department of Learning, Informatics, Management and Ethics, Medical Management Centre, Karolinska Institutet, Tomtebodavägen 18A, 17177, Stockholm, Sweden. E-mail: [helena.hvitfeldt.forsberg@ki.se](mailto:helena.hvitfeldt.forsberg@ki.se); Telephone number: 0046 852483783

Pamela Mazzocato PhD. Department of Learning Informatics Management and Ethics and Medical Management Center (MMC), Karolinska Institutet, Stockholm, Sweden.

Daniel Glaser MSc, Department of Learning Informatics Management and Ethics and Medical Management Center (MMC), Karolinska Institutet, Stockholm, Sweden.

Christina Keller PhD. Department of Informatics, Jönköping, International Business School, Jönköping, Sweden.

Maria Unbeck RN, PhD. Department of Orthopedics, Danderyd Hospital, Stockholm, Department of Clinical Sciences, Danderyd Hospital, Karolinska Institutet, Stockholm, Sweden.

\*Corresponding author: Helena Hvitfeldt Forsberg.

## Keywords

Simulation modeling, healthcare improvement, focus group, rheumatology, orthopedic care, emergency care.

## Word count

3200 excluding title page, abstract, strengths and limitations section, tables and references.

## Abstract

### Objective

To explore healthcare staffs' and managers' perceptions of how and when discrete event simulation modeling can be used as a decision support in improvement efforts.

### Design

Two focus group discussions were performed.

### Setting

Two settings were included: a rheumatology department and an orthopedic section both situated in Sweden.

### Participants

Healthcare staff and managers (n=13) from the two settings.

### Interventions

Two workshops were performed, one at each setting. Workshops were initiated by a short introduction to simulation modeling. Results from the respective simulation model were then presented and discussed in the following focus group discussion.

### Results

Categories from the content analysis are presented according to the following research questions: how and when simulation modeling can assist healthcare improvement? Regarding how, the participants mentioned that simulation modeling could act as a tool for support and a way to visualize problems, potential solutions and their effects. Regarding when, simulation modeling could be used both locally and by management, as well as a pedagogical tool to develop and test innovative ideas and to involve everyone in the improvement work.



## Conclusions

Its potential as an information and communication tool and as an instrument for pedagogic work within healthcare improvement render a broader application and value of simulation modeling than previously reported.

## Strengths and limitations of this study

- Customized simulation models were developed by the research team to address the specific needs of two hospital settings.
- Focus group discussions were conducted in close connection to real healthcare improvement efforts.
- The trustworthiness of the findings was strengthened by the fact that trained facilitators conducted the focus group and used a moderator guide, and that two researchers conducted the qualitative analysis.
- The study includes two clinical settings, which limit the transferability of the findings.

## Introduction

Healthcare improvement can be defined as joint efforts to improve patients' health, healthcare operations and staff development.<sup>1</sup> The complexity of healthcare improvement includes the size and scope of the initiative and the numerous contextual factors, which have caused the outcomes of healthcare quality improvement to be questioned.<sup>2-4</sup> Improvement work often builds on testing changes, initially on a small scale, to foster knowledge of how changes are implemented and affecting practice.<sup>5-6</sup> This strategy may make it difficult to predict outcomes not in close connection in time or space.<sup>7</sup>

Computer simulation modeling, such as discrete event simulation of healthcare systems and processes, has been proved as a valid tool for attending to problems in healthcare such as resource allocation, patient flows, epidemiological concerns and utilization of resources.<sup>8-12</sup>

All types of simulation aim to imitate reality in order to test, educate and increase learning. Regardless of the many models developed to elucidate important healthcare related issues, little research has been done on the use, implementation and value of simulation in the everyday context of healthcare.<sup>13-15</sup> However, research has shown that simulation modeling can enable informed decision-making, develop system knowledge, determine critical factors for the development of an organization, supply scenario analysis and options to choose from, help understand complex problems, facilitate communication and form plans and directions for future work.<sup>11 16</sup>

In the context of healthcare improvement, simulation modeling can help generate not only diagnostic data, but also knowledge and perspectives that can lead to predictive capacity.<sup>7</sup> Even so, the uptake of simulation modeling and other operation research tools have been slow in healthcare rendering few actual model implementation cases to learn from.<sup>13</sup> More research is needed to fully understand the impact and value of simulation modeling on the improvement of healthcare.<sup>8 12 14 15</sup>

The aim of this study was to explore healthcare staffs' and managers' perceptions of how and when discrete event simulation modeling can be used as a decision support in improvement efforts.

## Method

### Study design and setting

A qualitative study design was chosen to explore healthcare staffs' and managers' perceptions of discrete event simulation modeling, hereafter called simulation modeling, in two healthcare organizations: a rheumatology department and an orthopedic section at a central surgical unit (which includes an orthopedic department, an anesthetic and intensive care unit, and a surgical and urological department). The two units were part of two hospitals located in two different county councils in Sweden. An overview of the two organizational settings is presented in Table 1.

**Table 1** Overview of the included organizational settings

| Cases                   | Activity data                                                                                                                                                                                           | Hospital setting                                                                                                                           |
|-------------------------|---------------------------------------------------------------------------------------------------------------------------------------------------------------------------------------------------------|--------------------------------------------------------------------------------------------------------------------------------------------|
| Rheumatology department | 1,400 new referrals and 6,000 outpatient visits per year                                                                                                                                                | Publicly owned and financed county hospital with 2,300 employees. The hospital serves a population of 270,000 inhabitants.                 |
| Orthopedic section      | In total, 10,574 surgeries were performed at the central surgical unit in 2014, of which 4,512 were orthopedic surgeries (2,230 emergency and 2,282 elective surgeries) and 653 hip fracture surgeries. | Publicly owned and financed university hospital with 3,700 employees, and which has a catchment area of approximately 500,000 inhabitants. |

The Regional Ethics Committee in Stockholm has granted ethical approval for the study.

## Study participants

Purposeful sampling was used to select the study participants. Thus, all healthcare staff and managers involved in the project groups of the respective ongoing improvement efforts were deemed suitable to participate in this study because of their knowledge of the routines and needs of the organizations. All potential study participants were contacted via telephone and e-mail. Nine employees at the rheumatology department were invited. Of those, seven agreed to participate in the study. Two declined the invitation due to time constraints. At the orthopedic section, eight employees were invited. Of those, seven accepted the invitation, and one of those had a late cancellation due to acute illness and one declined due to a planned vacation. An overview of the study participants is presented in Table 2.

**Table 2** Study participants

| Case                    | Professional background and organizational role                                                                                                                             |
|-------------------------|-----------------------------------------------------------------------------------------------------------------------------------------------------------------------------|
| Rheumatology department | Four specialists in rheumatology and three registered nurses. One participant was a nurse manager and one the head of the department.                                       |
| Orthopedic section      | One orthopedic surgeon (also head of the trauma section at the orthopedic department) and five registered nurses, of whom two were nurse managers and one a section leader. |

## Data collection

Data was collected through two focus group discussions (FGDs) at the two units. Focus groups can be defined as organized, interactive group discussions that aim to explore a certain topic.<sup>17</sup> The method was chosen because focus groups are quite suitable when investigating experiences, attitudes and emerging ideas from a group.<sup>18-19</sup> According to Morgan,<sup>20, p. 2</sup> “the hallmark of focus groups is their explicit use of group interaction to produce data and insights that would be less accessible without the interaction found in the group.”

1  
2  
3 For both cases, customized simulation models were developed by the research team to address  
4 the units' specific needs. At the rheumatology department, improvement efforts aimed to  
5 improve the referral process for newly diagnosed patients. At the orthopedic section,  
6 improvement efforts aimed to improve access to care for patients with hip-fracture. Both  
7 contexts had previous research and improvement collaborations with the authors.  
8  
9

10  
11  
12 The process of developing the two simulation models for the two contexts was somewhat  
13 distinct. In the rheumatology department, where authors had been involved in the  
14 improvement work, the participants were introduced to simulation modeling during that work  
15 as an optional tool for improvement. During a workshop, they had the opportunity to test a  
16 simulation model representing the processes in focus of the ongoing improvement and its  
17 included variables. Immediately after the workshop, the FGD was performed.  
18  
19

20  
21  
22 In the orthopedic context, the participants were included in the simulation model building and  
23 validation of the simulation model during several meetings. The workshop and FGD were  
24 held at the end of the project time.  
25  
26  
27

28  
29 In both cases, the workshops began with a short introduction to simulation modeling and the  
30 researchers focus and questions. The researchers then presented the findings of the simulation  
31 model and led the FGDs on how and when simulation modeling could be used as a decision  
32 support in improvement efforts.  
33  
34  
35

36  
37 The FGD was conducted at the respective unit during one hour, and two trained researchers  
38 acted as moderators (CK and HHF in the rheumatology case and HHF and PM in the  
39 orthopedic case). The more experienced researcher moderated the FGD, and the other took  
40 notes and asked follow-up questions. The interviews were also recorded.  
41  
42  
43

44  
45 Before the initiation of the FGD, the participants were informed that the model developer  
46 would only be observing the FGD to let the participants freely discuss the model given their  
47 experience. The FGDs were initiated by asking all participants to comment briefly on their  
48 experience of the simulation model and their work with their specific questions. This ensured  
49 that all participants had a chance to share, and that the recordings included each participant.  
50 Following this introduction, the moderator's questions guided the rest of the FGD. The  
51 following themes were covered in the moderator guide:  
52  
53  
54  
55  
56  
57  
58  
59  
60

- 1
- 2
- 3     ▪ How was your experience of using the simulation model and the results?
- 4
- 5
- 6     ▪ What problems/issues/questions are suitable to address with simulation modeling in
- 7       healthcare?
- 8
- 9
- 10    ▪ How can simulation modeling connect to improvement work?
- 11
- 12
- 13    ▪ What are the values and trustworthiness of simulation modeling?
- 14

## 15     **Data analysis**

16

17

18     The FGDs were transcribed verbatim by transcribers, which were then analyzed using

19     qualitative content analysis. Content analysis is commonly used in social sciences<sup>21</sup> and is a

20     systematic analysis of text.<sup>22</sup> Two researchers (HHF and PM) conducted the coding and

21     categorization together following the three general steps of performing content analysis

22     outlined by Graneheim and Lundman.<sup>23</sup> The transcripts were read through before meaning

23     units were extracted and coded, and, finally, the codes were organized into categories. Each

24     step was performed individually before collaboratively reviewing the analyzed content and

25     reaching a consensus.

26

27

28

29

30

31

## 32     **Findings**

33

34

35     Results presented below are organized according to the different categories derived from the

36     qualitative content analysis.

37

38

39

## 40     **When can simulation modeling be used?**

### 41     **Improvement support**

42

43

44

45     The FGD participants described simulation as a tool that could be used to motivate change for

46     staff and management. This included changes that present challenges when implementing

47     because of budget constraints, big investments, staff resistance or lack of consensus.

48     Simulation modeling can support change implementation by visualizing both problems and

49     potential solutions. Simulation completes the picture of the limited financial or process

50     aspects of change by visualizing effects that are different dimensions of the same change.

51

52

53

54

55

56

57

58

59

60

### **Test and evaluate ideas for improvement**

Participants expressed repeatedly in both FGDs that simulation modeling could be used to evaluate the effect of changes that have either been implemented or that are under development or at an idea stage. Simulation modeling was considered a quicker and more efficient way to test new ideas, compared to testing in reality. Furthermore, changes can be tested without influencing patient care.

“It is exciting to be able to test a hypothesis in a computer environment to see what results you can anticipate,” said one FGD participant. “It is often difficult to test changes in real life; it takes time, costs money and results are sometimes uncertain.”

Participants also emphasized that simulation modeling could more systematically test change ideas and evaluate them, rather than just implementing changes without following up. In addition, they also shared how the model could be used as a pedagogical tool to develop and test ideas that could motivate staff to get engaged and involved in the improvement work.

“It’s a pedagogical tool to use in our work team in improvement work. By thinking that nothing is forbidden to suggest, we can test many different things and start thinking outside the box. It is so easy to get stuck in patterns,” another participant commented.

Moreover, testing of ideas got some of the participants to think about existing work routines, and new improvement ideas were created, while previous ideas were rejected.

“We thought that if we just had more rooms, all our problems would go away,” a participant said. “But we saw no substantial change when we tested it in the model. It all depends on the number of doctors that are available after all; that is the answer we got. We even saw that, right now, we are not using all the rooms efficiently.”

### **How can simulation modeling be used?**

#### **Questions suitable for simulation modeling**

Simulation modeling can be used to address concrete and measureable questions, including questions related to planning, resource allocation and staff scheduling. One area of application that was raised several times during the FGDs was related to cost efficiency.

1  
2  
3 “The future will be more about budgets and finances due to our expensive treatments. This  
4 [simulation model] can be a way to present financial figures to the management,” commented  
5 one participant.  
6  
7

8  
9 “It is easier to connect numbers with a cause rather than to just talk about the cause itself,”  
10 said another participant.  
11

12  
13 This [simulation model] includes showing the cost efficiency of changes implemented and to  
14 make staff more aware of costs related to certain operations. Further on, it can be used to find  
15 ways to use resources more efficiently.  
16  
17

## 18 19 **Validity**

20  
21  
22 Participants stressed the importance of building the model from valid and reliable data. Using  
23 incorrect data or data in an incorrect way will undermine the simulation model and the staff’s  
24 trust in the model. The simulation model must reflect the organization and real processes and  
25 data. Input from staff is important to ensure the validity of the model as they are the ones with  
26 knowledge of processes and operations.  
27  
28

29  
30  
31 As one participant put it, “The method is fine; the difficult part is what you put into the  
32 model.”  
33  
34

35  
36 Participants expressed that in order to use any simulation model, it is important that all  
37 processes and logics incorporated in the model are well known to the user. This is to prevent  
38 misinterpretation of the model output and results. Relying on and trusting the model requires a  
39 deep understanding of the model and participation during the process of building the model.  
40  
41

42  
43 “Users must be familiar with the model in order to critically evaluate results. [It’s] dangerous  
44 if results are interpreted in the wrong way,” expressed one participant.  
45  
46

## 47 48 **Conducting simulation modeling projects**

49  
50 Results from the FGDs revealed two aspects of simulation modeling use: local use at the  
51 clinic in their improvement work, and to guide management on planned changes or responses  
52 to changes suggested by management. Staff must be involved from the beginning to inform  
53  
54  
55



1  
2  
3 the building of the model with data and questions to test in the model. Involving staff from the  
4 beginning also helps develop trust in the simulation model.  
5

6  
7 “A simulation project must be approved by management and well supported by the staff,” said  
8 one participant.  
9

10  
11 “In improvement work, involvement from everyone is essential, perhaps simulation modeling  
12 can act as a tool to inform and inspire colleagues,” commented another.  
13

14  
15 Simulation modeling projects must be approved by management and staff and be well  
16 communicated within the organization. The group working with the simulation model cannot  
17 be too big and there must be a person in charge of the work. The importance of using the  
18 simulation model together, in multi-disciplinary teams, was emphasized. Specific persons  
19 holding positions, such as schedulers, nurse managers and heads of departments were  
20 mentioned as potential users.  
21

22  
23 “Simulation modeling should be used locally, at our clinic and by us,” a person said. “It  
24 should be used to show how we work and our results, at meetings and externally as  
25 marketing.”  
26

27  
28 Another participant described the simulation model as, “a good tool to show management  
29 what we do and our plans.”  
30

### 31 32 33 34 35 36 37 **Value and opportunities** 38

39  
40 Overall, participants expressed a positive attitude towards simulation modeling. They  
41 identified different opportunities for simulation modeling to add value to the development of  
42 their organization. These include identifying trends and understanding complex relationships  
43 between processes and systems. Moreover, simulation can help the staff face future  
44 challenges collaboratively.  
45

46  
47 The following quotes help illustrate the overall outlook of simulation modeling among the  
48 participants:  
49

50  
51 “Simulation modeling at the right time can be very valuable. When initiating improvement, it  
52 is beneficial to see how small changes can have great effects.”  
53  
54  
55  
56  
57

1  
2  
3 “You get an overview; you see the overall picture that can be used to stimulate improvement  
4 work.”  
5

6  
7 “Simulation modeling can help you find new models and aid the individual learning when  
8 seeing the relation to their respective work. To the organization, it might be more on how to  
9 accomplish goals and see how the overall picture is affected?”  
10  
11

## 12 13 **Discussion**

14  
15  
16 This study set out to explore healthcare staffs’ and managers’ perceptions of how and when  
17 simulation modeling can be used as a decision support in improvement efforts. Simulation  
18 was described as a tool that could be used to evaluate and develop improvement ideas and  
19 help motivate the need to implement certain changes both for staff and for management. Also,  
20 simulation modeling can motivate difficult change by visualizing effects and also financial  
21 aspects. Simulation modeling was best valued as a way to address concrete and measurable  
22 questions related to planning, resource allocation, staff scheduling and cost efficiency. Two  
23 areas of simulation modeling use in healthcare improvement were stressed in the two focus  
24 groups: locally in the clinical improvement work and to guide management on planned  
25 changes. Also, the early involvement of staff in the simulation project and use of correct data  
26 to validate the model is crucial for staff to trust and use the model.  
27  
28  
29  
30  
31  
32  
33

34  
35 When comparing the results to previous literature on simulation modeling, there are several  
36 evident similarities. Concerning the potential users of the simulation model, at the clinical  
37 level or in management, it is important to consider model knowledge and the ability to present  
38 it to others, data availability and support from leadership.<sup>14</sup> Regarding testing and exploring  
39 what is outside of the box, Pidd describes simulation as a vehicle for experimentation where  
40 trial and error can be performed without concerns for reality, but with a great opportunity to  
41 learn.<sup>23</sup> Simulation modeling offers a holistic view on addressing change and improvement in  
42 complex systems and its inherent components by displaying the effects of change  
43 immediately.<sup>7</sup> Visualizing the problem and a potential solution was, in the FGDs, considered  
44 powerful in engaging healthcare staff in improvement work. This interactive opportunity has  
45 been proposed to help motivate staff to embrace change.<sup>7</sup> However, the formation of a  
46 representable clinical team to facilitate the simulation modeling work is not always easy.<sup>15</sup>  
47  
48  
49  
50  
51  
52  
53  
54  
55  
56  
57  
58  
59  
60  
Our first simulation focus group revealed a wish to include management, and the second focus

1  
2  
3 group wanted to include the staff further. Co-producing the model with staff, managers and  
4 modelers, also known as facilitated modeling, are important to build a step-by-step  
5 understanding of the model logic and its validity.<sup>24-29</sup> The early and continuous involvement  
6 of stakeholder in a structured model development process increases stakeholders trust in the  
7 model.<sup>30</sup> Depending on the identified users, simulation models can be used to aid  
8 communication in creating a shared mental model.<sup>26 31-33</sup>

9  
10  
11  
12  
13  
14 Drawing from our results, we can see values emerging from simulation modeling, such as  
15 providing a way to work with change and improvement (especially when initiating  
16 improvement work), and visually communicate planned changes, operations and the  
17 subsequent consequences. Simulation modeling can be a tool to be used at different levels of  
18 healthcare, but according to our findings, it might be best suited for local clinical  
19 improvement and management planning and allocating resources. Before initiating a  
20 simulation modeling project, the formation of the project team is essential for ensuring model  
21 validity and reliability. Bringing in the aspects of implementation, evaluation and research  
22 requires even greater consideration of the project team, but might enable the transition from  
23 in-silico to in-reality and create value for the healthcare organization.

24  
25  
26  
27  
28  
29  
30  
31  
32  
33  
34  
35  
36  
37  
38  
39  
40  
41  
42  
43  
44  
45  
46  
47  
48  
49  
50  
51  
52  
53  
54  
55  
56  
57  
58  
59  
60  
61  
62  
63  
64  
65  
66  
67  
68  
69  
70  
71  
72  
73  
74  
75  
76  
77  
78  
79  
80  
81  
82  
83  
84  
85  
86  
87  
88  
89  
90  
91  
92  
93  
94  
95  
96  
97  
98  
99  
100  
101  
102  
103  
104  
105  
106  
107  
108  
109  
110  
111  
112  
113  
114  
115  
116  
117  
118  
119  
120  
121  
122  
123  
124  
125  
126  
127  
128  
129  
130  
131  
132  
133  
134  
135  
136  
137  
138  
139  
140  
141  
142  
143  
144  
145  
146  
147  
148  
149  
150  
151  
152  
153  
154  
155  
156  
157  
158  
159  
160  
161  
162  
163  
164  
165  
166  
167  
168  
169  
170  
171  
172  
173  
174  
175  
176  
177  
178  
179  
180  
181  
182  
183  
184  
185  
186  
187  
188  
189  
190  
191  
192  
193  
194  
195  
196  
197  
198  
199  
200  
201  
202  
203  
204  
205  
206  
207  
208  
209  
210  
211  
212  
213  
214  
215  
216  
217  
218  
219  
220  
221  
222  
223  
224  
225  
226  
227  
228  
229  
230  
231  
232  
233  
234  
235  
236  
237  
238  
239  
240  
241  
242  
243  
244  
245  
246  
247  
248  
249  
250  
251  
252  
253  
254  
255  
256  
257  
258  
259  
260  
261  
262  
263  
264  
265  
266  
267  
268  
269  
270  
271  
272  
273  
274  
275  
276  
277  
278  
279  
280  
281  
282  
283  
284  
285  
286  
287  
288  
289  
290  
291  
292  
293  
294  
295  
296  
297  
298  
299  
300  
301  
302  
303  
304  
305  
306  
307  
308  
309  
310  
311  
312  
313  
314  
315  
316  
317  
318  
319  
320  
321  
322  
323  
324  
325  
326  
327  
328  
329  
330  
331  
332  
333  
334  
335  
336  
337  
338  
339  
340  
341  
342  
343  
344  
345  
346  
347  
348  
349  
350  
351  
352  
353  
354  
355  
356  
357  
358  
359  
360  
361  
362  
363  
364  
365  
366  
367  
368  
369  
370  
371  
372  
373  
374  
375  
376  
377  
378  
379  
380  
381  
382  
383  
384  
385  
386  
387  
388  
389  
390  
391  
392  
393  
394  
395  
396  
397  
398  
399  
400  
401  
402  
403  
404  
405  
406  
407  
408  
409  
410  
411  
412  
413  
414  
415  
416  
417  
418  
419  
420  
421  
422  
423  
424  
425  
426  
427  
428  
429  
430  
431  
432  
433  
434  
435  
436  
437  
438  
439  
440  
441  
442  
443  
444  
445  
446  
447  
448  
449  
450  
451  
452  
453  
454  
455  
456  
457  
458  
459  
460  
461  
462  
463  
464  
465  
466  
467  
468  
469  
470  
471  
472  
473  
474  
475  
476  
477  
478  
479  
480  
481  
482  
483  
484  
485  
486  
487  
488  
489  
490  
491  
492  
493  
494  
495  
496  
497  
498  
499  
500  
501  
502  
503  
504  
505  
506  
507  
508  
509  
510  
511  
512  
513  
514  
515  
516  
517  
518  
519  
520  
521  
522  
523  
524  
525  
526  
527  
528  
529  
530  
531  
532  
533  
534  
535  
536  
537  
538  
539  
540  
541  
542  
543  
544  
545  
546  
547  
548  
549  
550  
551  
552  
553  
554  
555  
556  
557  
558  
559  
560  
561  
562  
563  
564  
565  
566  
567  
568  
569  
570  
571  
572  
573  
574  
575  
576  
577  
578  
579  
580  
581  
582  
583  
584  
585  
586  
587  
588  
589  
590  
591  
592  
593  
594  
595  
596  
597  
598  
599  
600  
601  
602  
603  
604  
605  
606  
607  
608  
609  
610  
611  
612  
613  
614  
615  
616  
617  
618  
619  
620  
621  
622  
623  
624  
625  
626  
627  
628  
629  
630  
631  
632  
633  
634  
635  
636  
637  
638  
639  
640  
641  
642  
643  
644  
645  
646  
647  
648  
649  
650  
651  
652  
653  
654  
655  
656  
657  
658  
659  
660  
661  
662  
663  
664  
665  
666  
667  
668  
669  
670  
671  
672  
673  
674  
675  
676  
677  
678  
679  
680  
681  
682  
683  
684  
685  
686  
687  
688  
689  
690  
691  
692  
693  
694  
695  
696  
697  
698  
699  
700  
701  
702  
703  
704  
705  
706  
707  
708  
709  
710  
711  
712  
713  
714  
715  
716  
717  
718  
719  
720  
721  
722  
723  
724  
725  
726  
727  
728  
729  
730  
731  
732  
733  
734  
735  
736  
737  
738  
739  
740  
741  
742  
743  
744  
745  
746  
747  
748  
749  
750  
751  
752  
753  
754  
755  
756  
757  
758  
759  
760  
761  
762  
763  
764  
765  
766  
767  
768  
769  
770  
771  
772  
773  
774  
775  
776  
777  
778  
779  
780  
781  
782  
783  
784  
785  
786  
787  
788  
789  
790  
791  
792  
793  
794  
795  
796  
797  
798  
799  
800  
801  
802  
803  
804  
805  
806  
807  
808  
809  
810  
811  
812  
813  
814  
815  
816  
817  
818  
819  
820  
821  
822  
823  
824  
825  
826  
827  
828  
829  
830  
831  
832  
833  
834  
835  
836  
837  
838  
839  
840  
841  
842  
843  
844  
845  
846  
847  
848  
849  
850  
851  
852  
853  
854  
855  
856  
857  
858  
859  
860  
861  
862  
863  
864  
865  
866  
867  
868  
869  
870  
871  
872  
873  
874  
875  
876  
877  
878  
879  
880  
881  
882  
883  
884  
885  
886  
887  
888  
889  
890  
891  
892  
893  
894  
895  
896  
897  
898  
899  
900  
901  
902  
903  
904  
905  
906  
907  
908  
909  
910  
911  
912  
913  
914  
915  
916  
917  
918  
919  
920  
921  
922  
923  
924  
925  
926  
927  
928  
929  
930  
931  
932  
933  
934  
935  
936  
937  
938  
939  
940  
941  
942  
943  
944  
945  
946  
947  
948  
949  
950  
951  
952  
953  
954  
955  
956  
957  
958  
959  
960  
961  
962  
963  
964  
965  
966  
967  
968  
969  
970  
971  
972  
973  
974  
975  
976  
977  
978  
979  
980  
981  
982  
983  
984  
985  
986  
987  
988  
989  
990  
991  
992  
993  
994  
995  
996  
997  
998  
999  
1000

Limitations in our study design include the fact that we have drawn conclusions from limited empirical data gathered from two FGDs only. Nevertheless, an exploratory study like this could serve as a pilot for further research. All staff and managers involved in the improvement project teams were invited to attend the FGDs and thus the concept of saturation was not applicable. FGDs themselves can be subject to different impediments if not moderated well. The group dynamics are essential for allowing everyone to talk and present their opinion.<sup>18 34 35</sup> Using trained facilitators, a moderator guide and introductory questions for everyone to answer may have helped participants feel free to share their perceptions openly.

## Conclusions

The emerging categories from the content analysis are presented according to the research questions of how and when simulation modeling can assist healthcare improvement. Regarding how, the participants mentioned that simulation modeling can act as a tool for support and a way to visualize problems and potential solutions, as an information and

1  
2  
3 communication tool to show management planned improvements and their effect. Simulation  
4 modeling could be used both locally and by management, but the user should be familiar with  
5 model logic and data to interpret results correctly. Relating to when, participants thought  
6 simulation modeling could be used as a pedagogical tool to develop and test ideas, to think  
7 outside the box and to get everyone involved in the improvement work.  
8  
9

10  
11  
12 This study showed that simulation modeling has more to offer than has been described in  
13 previous literature. Its potential as an information and communication tool, an instrument for  
14 pedagogic work within healthcare improvement, and as a way to allow thinking outside the  
15 box, render a broader application and value of simulation modeling.  
16  
17

### 18 19 20 **Contributorship statement**

21  
22  
23 HHF, PM, DG, CK and MU designed the study. HHF, PM, CK and MU collected the data.  
24 HHF, PM, CK and MU drafted the manuscript. All authors have been involved in reading and  
25 critically revising the manuscript. They have approved the final manuscript and are  
26 accountable for all parts of the work.  
27  
28

### 29 30 **Competing interests**

31  
32  
33 The authors declare that they have no competing interests.  
34  
35

### 36 **Funding**

37  
38  
39 The study was supported by grants provided by the Stockholm County Council (ALF project).  
40 The funder had no involvement in study design, data analysis, and manuscript preparation or  
41 publication decision.  
42  
43

### 44 45 **Data sharing statement**

46  
47  
48 FGD moderators guide are available upon request to the authors.  
49

### 50 51 **Acknowledgements**

52  
53  
54 The authors wish to thank the involved units for their participation in this study.  
55  
56  
57

## References

1. Batalden PB, Davidoff F. What is "quality improvement" and how can it transform healthcare? *Qual Saf Health Care* 2007;16:2–3.
2. Blumenthal D, Kilo CM. A report card on continuous quality improvement. *Milbank Q*, 1998;76:625–48, 511.
3. Kaplan HC, Brady PW, Dritz MC, *et al*. The influence of context on quality improvement success in health care: a systematic review of the literature. *Milbank Q* 2010;88:500–59.
4. Thor J, Herrlin B, Wittlov K, *et al*. Evolution and outcomes of a quality improvement program. *Int J Health Care Qual Assur* 2010;23:312–27.
5. Langley GJ. *The improvement guide: a practical approach to enhancing organizational performance*. San Francisco: Jossey-Bass, 2009.
6. Shewhart WA, Deming WE. *Statistical method from the viewpoint of quality control*. New York: Dover, 1986.
7. Slovensky DJ, Morin B. Learning through simulation: the next dimension in quality improvement. *Qual Manag Health Care* 1997;5:72–9.
8. Fone D, Hollinghurst S, Temple M, *et al*. Systematic review of the use and value of computer simulation modelling in population health and health care delivery. *J Public Health Med* 2003;25:325–35.
9. Brailsford S, Harper P, Patel B, *et al*. An analysis of the academic literature on simulation and modeling in health care. *J Simulation* 2009;3:130–140.
10. Günal M, Pidd M. Discrete event simulation for performance modelling in health care: a review of the literature. *J Simulation* 2010;4:42–51.
11. Forsberg HH, Aronsson H, Keller C, *et al*. Managing health care decisions and improvement through simulation modeling. *Qual Manag Health Care* 2011; 20:15–29.

12. Jun JB, Jacobson SH, Swisher JR. Application of discrete-event simulation in health care clinics: A survey. *J Oper Res Soc* 1999;50:109–123.
13. Brailsford S. Overcoming the barriers to implementation of operations research simulation models in healthcare. *Clin Invest Med* 2005;28:312–5.
14. Brailsford S, Bolt TB, Bucci G, *et al.* Overcoming the barriers: a qualitative study of simulation adoption in the NHS. *J Oper Res Soc* 2011.
15. Monks T, Pearson M, Pitt M, *et al.* Evaluating the impact of a simulation study in emergency stroke care. *Operations Research for Health Care* 2015;6:40–49.
16. Tako AA, Kotiadis K, Vasilakis C, *et al.* Improving patient waiting times: a simulation study of an obesity care service. *BMJ Qual Saf* 2014;23:373–381.
17. Becker S, Bryman A, (red.). *Understanding research for social policy and practice: themes, methods and approaches*. Bristol: Policy, 2004.
18. Krueger RA, Casey MA. *Focus groups: a practical guide for applied research*. Thousand Oaks, Calif.: Sage Publications, 2000.
19. Pope C, van Royen P, Baker R. Qualitative methods in research on healthcare quality. *Qual Saf Health Care* 2002;11:148–52.
20. Morgan DL. *Focus groups as qualitative research*. Thousand Oaks, Calif.: Sage Publications, 1997.
21. Dixon-Woods M, Agarwal S, Jones D, *et al.* Synthesising qualitative and quantitative evidence: a review of possible methods. *J Health Serv Res Policy* 2005;10:45–53.
22. Krippendorff, K. *Content analysis: an introduction to its methodology*. Thousand Oaks, Calif.: Sage, 2004.
23. Graneheim UH, Lundman B. Qualitative content analysis in nursing research: concepts, procedures and measures to achieve trustworthiness. *Nurse Educ Today* 2004;24:105–12.
24. Pidd M. *Computer simulation in management science*. Hoboken, NJ: Wiley, 2004.

- 1  
2  
3 25. Aharonson-Daniel L, Paul RJ, Hedley AJ. Management of queues in out-patient  
4 departments: the use of computer simulation. *J Manag Med* 1996;10:50–8, 3.  
5  
6  
7 26. Alkaabi R, El Halim AOA, Mahmoud S. Improving resource allocation efficiency in  
8 health care delivery systems. 19th Annual Canadian Conference on Electrical and  
9 Computer Engineering, May 07-10 2006 Ottawa, Canada. 2360-2365.  
10  
11  
12 27. Cochran JK, Bharti A. Stochastic bed balancing of an obstetrics hospital. *Health Care*  
13 *Manag Sci* 2006;9:31–45.  
14  
15  
16 28. Banks J. *Handbook of simulation: principles, methodology, advances, applications,*  
17 *and practice.* New York: Wiley, 1998.  
18  
19  
20 29. Franco LA, Montibeller G. Facilitated modelling in operational research. *EJOR* 2010;  
21 205:489–500.  
22  
23  
24 30. Tako AA, Kotiadis K. PartiSim: a multi-methodology framework to support  
25 facilitated simulation modelling in healthcare. *EJOR*, 2015;244:555–564  
26  
27  
28 31. Elkhuizen SG, Das SF, Bakker PJ, *et al.* Using computer simulation to reduce access  
29 time for outpatient departments. *Qual Saf Health Care* 2007;16:382–6.  
30  
31  
32 32. Heinrichs M, Beekman R, Limburg M. Simulation to estimate the capacity of a stroke  
33 unit. *Stud Health Technol Inform* 2000;77:47–50.  
34  
35  
36 33. Rytälä J, Spens K. Using simulation to increase efficiency in blood supply chains.  
37 *Management Research News* 2006;29:801–819.  
38  
39  
40 34. Robson C. *Real world research: a resource for social scientists and practitioner-*  
41 *researchers.* Oxford: Blackwell Publishers, 2002.  
42  
43  
44 35. Marshall C, Rossman GB. *Designing qualitative research.* Thousand Oaks, Calif.:  
45 Sage. 2006.  
46  
47  
48  
49  
50  
51  
52  
53  
54  
55  
56  
57  
58  
59  
60

## Consolidated criteria for reporting qualitative studies (COREQ): 32-item checklist

| No. Item                                       | Guide questions/description                                                                                                                              | Comment                                                              |
|------------------------------------------------|----------------------------------------------------------------------------------------------------------------------------------------------------------|----------------------------------------------------------------------|
| <b>Domain 1: Research team and reflexivity</b> |                                                                                                                                                          |                                                                      |
| <i>Personal Characteristics</i>                |                                                                                                                                                          |                                                                      |
| 1. Inter viewer/facilitator                    | Which author/s conducted the inter view or focus group?                                                                                                  | Please see Methods and Data collection, p 7                          |
| 2. Credentials                                 | What were the researcher's credentials? E.g. PhD, MD                                                                                                     | Please see Title page<br>CK: PhD<br>HHF: MSc and PhD<br>PM: PhD      |
| 3. Occupation                                  | What was their occupation at the time of the study?                                                                                                      | CK: Researcher<br>HHF: Doctoral student and post doc<br>PM: Post Doc |
| 4. Gender                                      | Was the researcher male or female?                                                                                                                       | Research team was a mix.                                             |
| 5. Experience and training                     | What experience or training did the researcher have?                                                                                                     | Please see Methods and Data collection, p 7.                         |
| <i>Relationship with participants</i>          |                                                                                                                                                          |                                                                      |
| 6. Relationship established                    | Was a relationship established prior to study commencement?                                                                                              | Yes, please see Methods and Data collection, p 7                     |
| 7. Participant knowledge of the interviewer    | What did the participants know about the researcher? e.g. personal goals, reasons for doing the research                                                 | Please see Methods and Data collection, p 7.                         |
| 8. Interviewer characteristics                 | What characteristics were reported about the inter viewer/facilitator? e.g. Bias, assumptions, reasons and interests in the research topic               | Please see Methods and Data collection, p 7                          |
| <b>Domain 2: study design</b>                  |                                                                                                                                                          |                                                                      |
| <i>Theoretical framework</i>                   |                                                                                                                                                          |                                                                      |
| 9. Methodological orientation and Theory       | What methodological orientation was stated to underpin the study? e.g. grounded theory, discourse analysis, ethnography, phenomenology, content analysis | Please see Methods and Data Analysis, p 8.                           |
| <i>Participant selection</i>                   |                                                                                                                                                          |                                                                      |
| 10. Sampling                                   | How were participants selected? e.g. purposive, convenience, consecutive, snowball                                                                       | Please see Methods and Study participants, p 6                       |
| 11. Method of approach                         | How were participants approached?                                                                                                                        | Please see Methods                                                   |



|                                  |                                                                                   |                                                                                                                                                                                                                                                                                 |
|----------------------------------|-----------------------------------------------------------------------------------|---------------------------------------------------------------------------------------------------------------------------------------------------------------------------------------------------------------------------------------------------------------------------------|
|                                  | e.g. face-to-face, telephone, mail, email                                         | and Study participants, p 6                                                                                                                                                                                                                                                     |
| 12. Sample size                  | How many participants were in the study?                                          | Please see Methods and Study participants, p 6                                                                                                                                                                                                                                  |
| 13. Non-participation            | How many people refused to participate or dropped out? Reasons?                   | Please see Methods and Study participants, p 6                                                                                                                                                                                                                                  |
| <i>Setting</i>                   |                                                                                   |                                                                                                                                                                                                                                                                                 |
| 14. Setting of data collection   | Where was the data collected? e.g. home, clinic, workplace                        | Please see Methods and Study design and setting, p 5                                                                                                                                                                                                                            |
| 15. Presence of non-participants | Was anyone else present besides the participants and researchers?                 | No                                                                                                                                                                                                                                                                              |
| 16. Description of sample        | What are the important characteristics of the sample? e.g. demographic data, date | Please see Methods and Study participants, p 6                                                                                                                                                                                                                                  |
| <i>Data collection</i>           |                                                                                   |                                                                                                                                                                                                                                                                                 |
| 17. Interview guide              | Were questions, prompts, guides provided by the authors? Was it pilot tested?     | The interview guide was not pilot tested but developed in the research team. Please see Methods and Data collection, p 7.                                                                                                                                                       |
| 18. Repeat interviews            | Were repeat interviews carried out? If yes, how many?                             | No                                                                                                                                                                                                                                                                              |
| 19. Audio/visual recording       | Did the research use audio or visual recording to collect the data?               | Audio recording. Please see Methods and Data collection, p 7                                                                                                                                                                                                                    |
| 20. Field notes                  | Were field notes made during and/or after the interview or focus group?           | Please see Methods and Data collection, p 7                                                                                                                                                                                                                                     |
| 21. Duration                     | What was the duration of the interviews or focus group?                           | The duration was approx. 1 hour                                                                                                                                                                                                                                                 |
| 22. Data saturation              | Was data saturation discussed?                                                    | Yes in the limitation part of the Discussion, p 13. Participants were not recruited until data saturation was achieved since this was not applicable due to that all healthcare staff and managers involved in the project groups of the respective ongoing improvement efforts |

|                                        |                                                                                                                                 |                                                                                        |
|----------------------------------------|---------------------------------------------------------------------------------------------------------------------------------|----------------------------------------------------------------------------------------|
|                                        |                                                                                                                                 | were invited.                                                                          |
| 23. Transcripts returned               | Were transcripts returned to participants for comment and/or correction?                                                        | No                                                                                     |
| <b>Domain 3: analysis and findings</b> |                                                                                                                                 |                                                                                        |
| <i>Data analysis</i>                   |                                                                                                                                 |                                                                                        |
| 24. Number of data coders              | How many data coders coded the data?                                                                                            | Please see Methods and Data Analysis on p 8.                                           |
| 25. Description of the coding tree     | Did authors provide a description of the coding tree?                                                                           | No                                                                                     |
| 26. Derivation of themes               | Were themes identified in advance or derived from the data?                                                                     | Please see Findings on p 8.                                                            |
| 27. Software                           | What software, if applicable, was used to manage the data?                                                                      | No software was used.                                                                  |
| 28. Participant checking               | Did participants provide feedback on the findings?                                                                              | No                                                                                     |
| <i>Reporting</i>                       |                                                                                                                                 |                                                                                        |
| 29. Quotations presented               | Were participant quotations presented to illustrate the themes/findings? Was each quotation identified? e.g. participant number | Please see the Findings, p 9-11. Quotes were used, no identification number were used. |
| 30. Data and findings consistent       | Was there consistency between the data presented and the findings?                                                              | Yes, please see the outline of the Findings p 8-11.                                    |
| 31. Clarity of major themes            | Were major themes clearly presented in the findings?                                                                            | Yes, please see Findings p 8.                                                          |
| 32. Clarity of minor themes            | Is there a description of diverse cases or discussion of minor themes?                                                          | Yes as an integrated part of the Findings section, p 8-11                              |
